# Supplementary material
Source: publisher figshare collection journal article supplement (https://gsajournals.figshare.com/ndownloader/files/17412917)
Supplement: Supplementary file 1 [file 17412917]

## Sheet: Sheet1
Table S2 Detailed information about the exome capture data from 62 barley landraces
Accession	SRA_ID	Country	Latitude	Longitude	Elevation	Habit	Row_number	Line_type	Source	Platform	Seq_Length(bp)	Read_Count_R1	%_Remaining_After_Dedup_R1	Read_Count_R2	%_Remaining_After_Dedup_R2	Total_Reads_BAM	Mapped_Reads_BAM	Proportion_Mapped_Reads	Coverage_Median	Coverage_Mean
CIho_13743	SAMN09918014	Eritrea	15.403	39.003	1827	S	6	Landrace	BRIDG6	Illumina Hi-Seq 2500	101	15991436	58.442	15991436	59.6788	20751217	20348284	0.980583	8	12.5999
CIho_14052	SAMN09918016	Algeria	34.856	5.739	110	S	6	Landrace	BRIDG6	Illumina Hi-Seq 2500	101	16925721	61.6572	16925721	62.8154	23219487	22787494	0.981395	9	14.5656
CIho_14216	SAMN09918018	Mongolia	46.144	105.144	1363	S	6	Landrace	BRIDG6	Illumina Hi-Seq 2500	101	20764936	43.748	20764936	45.6316	19781838	19241907	0.972706	7	11.6513
CIho_14228	SAMN09918020	Mongolia	46.145	105.145	1367	S	6	Landrace	BRIDG6	Illumina Hi-Seq 2500	100	16372515	69.945	16372515	70.4274	24697583	24308937	0.984264	9	15.5173
CIho_14258	SAMN09918022	Afghanistan	30.502	62.002	536	S	6	Landrace	BRIDG6	Illumina Hi-Seq 2500	100	17274405	68.7764	17274405	69.3207	25613752	25166440	0.982536	9	15.9481
CIho_14394	SAMN09283179	Armenia	40.011	45.011	2050	S	2	Landrace	BRIDG6	Illumina Hi-Seq 2500	126	32271110	81.1	32271110	53.3268	37413990	35695718	0.954074	17	28.7025
CIho_14881	SAMN09918026	Eritrea	15.403	39.003	1827	S	6	Landrace	BRIDG6	Illumina Hi-Seq 2500	100	17339297	70.1086	17339297	70.5949	26427588	26032785	0.985061	9	16.7627
CIho_15349	SAMN09918028	Tunisia	33.993	9.06	27	S	6	Landrace	BRIDG6	Illumina Hi-Seq 2500	100	15170661	74.8272	15170661	75.2165	24444744	24070611	0.984695	9	15.6004
CIho_15362	SAMN09918030	Tunisia	37.262	10.059	74	S	6	Landrace	BRIDG6	Illumina Hi-Seq 2500	101	14999664	59.7227	14999664	60.747	19789137	19393470	0.980006	7	12.1028
PI_39590	SAMN09924413	Algeria	35.423	0.173	701	S	6	Landrace	BRIDG6	Illumina Hi-Seq 2500	101	18468447	46.7963	18468447	48.6506	18526049	18031861	0.973325	7	10.9686
PI_135758	SAMN09924441	Afghanistan	35.935	66.419	1249	S	6	Landrace	BRIDG6	Illumina Hi-Seq 2500	100	15875019	72.7458	15875019	73.3022	24896754	24477154	0.983146	9	15.5645
PI_173518	SAMN09924447	Turkey	41.596	35.777	41	S	6	Landrace	BRIDG6	Illumina Hi-Seq 2500	101	13313058	67.6152	13313058	68.9056	19662086	19289741	0.981063	8	12.5063
PI_178609	SAMN09924452	Turkey	40.866	36.046	1194	S	6	Landrace	BRIDG6	Illumina Hi-Seq 2500	100	16260596	70.3758	16260596	71.0294	24480081	24087592	0.983967	9	15.567
PI_181102	SAMN09924455	India	32.691	77.107	5333	S	6	Landrace	BRIDG6	Illumina Hi-Seq 2500	100	16376651	69.2547	16376651	69.7673	24305666	23877703	0.982392	9	15.1695
PI_190790	SAMN09924460	Korea North	40.129	127.129	1025	S	6	Landrace	BRIDG6	Illumina Hi-Seq 2500	100	16008297	72.6629	16008297	73.2117	25065208	24726046	0.986469	9	15.7475
PI_227449	SAMN09283180	Iran	29.11	53.11	1886	S	2	Landrace	BRIDG6	Illumina Hi-Seq 2500	100	17611258	69.7842	17611258	70.3699	26831764	26421814	0.984721	10	17.0164
PI_270692	SAMN09924464	Peru	-15.8833	-69.8833	3810	S	6	Landrace	BRIDG6	Illumina Hi-Seq 2500	100	15753898	70.9422	15753898	71.4877	23963444	23578465	0.983935	9	15.1756
PI_282616	SAMN09924468	Israel	31.617	34.867	233	S	6	Landrace	BRIDG6	Illumina Hi-Seq 2500	100	16659104	70.3532	16659104	70.6737	25126931	24764371	0.985571	9	15.8983
PI_285118	SAMN09283181	Eritrea	15.07	39.07	2113	S	2	Landrace	BRIDG6	Illumina Hi-Seq 2500	101	13598476	64.4116	13598476	65.7	19263585	18850573	0.97856	8	12.1128
PI_286388	SAMN09283182	Eritrea	15.404	39.004	1829	S	2	Landrace	BRIDG6	Illumina Hi-Seq 2500	100	15327421	71.5787	15327421	71.9983	23507892	23142463	0.984455	9	14.8784
PI_296460	SAMN09924470	Eritrea	15.837	38.521	1368	S	6	Landrace	BRIDG6	Illumina Hi-Seq 2500	126	36186918	47.6347	36186918	50.6179	39384988	37960585	0.963834	18	30.9401
PI_296472	SAMN09283183	Ethiopia	8.074	38.074	2733	S	2	Landrace	BRIDG6	Illumina Hi-Seq 2500	126	46855179	24.903	46855179	27.7993	27300552	25977261	0.951529	10	17.7394
PI_298708	SAMN09924473	Ethiopia	7.808	36.658	1761	S	6	Landrace	BRIDG6	Illumina Hi-Seq 2500	100	14919077	75.1003	14919077	75.4783	24208482	23866909	0.98589	9	15.4249
PI_328336	SAMN09283184	Turkey	39.274	35.126	NA	S	2	Landrace	BRIDG6	Illumina Hi-Seq 2500	101	17389705	47.6347	17389705	49.5267	17807728	17323939	0.972833	7	10.4897
PI_328485	SAMN09924490	Greece	35.017	26.1	20	S	6	Landrace	BRIDG6	Illumina Hi-Seq 2500	100	15766700	70.4039	15766700	71.1733	23835748	23350323	0.979635	9	15.0878
PI_328577	SAMN09924493	Greece	36.75	22.567	124	S	6	Landrace	BRIDG6	Illumina Hi-Seq 2500	100	16443559	69.3345	16443559	69.9642	24475306	23986501	0.980029	9	15.3007
PI_328632	SAMN09924495	Greece	35.367	23.633	507	S	6	Landrace	BRIDG6	Illumina Hi-Seq 2500	100	14421119	73.1423	14421119	73.913	22665989	22250405	0.981665	8	14.2047
PI_329000	SAMN09924498	Ethiopia	8.075	38.075	NA	S	5	Landrace	BRIDG6	Illumina Hi-Seq 2500	126	27665597	34.8648	27665597	38.0216	21353630	20797586	0.97396	9	14.638
PI_342139	SAMN09283185	Turkey	38.5	29.417	NA	S	2	Landrace	BRIDG6	Illumina Hi-Seq 2500	101	19842936	45.5143	19842936	47.5115	19588284	19066452	0.97336	7	11.6809
PI_342283	SAMN09283186	Turkey	39.25	29.5	NA	S	2	Landrace	BRIDG6	Illumina Hi-Seq 2500	100	16753101	71.4131	16753101	72.2175	25768118	25250403	0.979909	9	16.2845
PI_329000	SAMN09924498	Ethiopia	8.075	38.075	NA	S	5	Landrace	BRIDG6	Illumina Hi-Seq 2500	126	27665597	34.8648	27665597	38.0216	21353630	20797586	0.97396	9	14.638
PI_349896	SAMN09283188	Serbia	43.445	19.753	1275	S	2	Landrace	BRIDG6	Illumina Hi-Seq 2500	101	11973456	62.7047	11973456	63.7771	16526389	16178854	0.978971	6	10.1244
PI_350713	SAMN09283189	Austria	47.017	13.617	1161	S	2	Landrace	BRIDG6	Illumina Hi-Seq 2500	101	14252558	64.3292	14252558	65.6818	20270160	19879764	0.98074	8	12.8807
PI_356719	SAMN09924501	Morocco	32.149	-4.851	NA	S	6	Landrace	BRIDG6	Illumina Hi-Seq 2500	101	19348682	46.5074	19348682	48.2777	19467713	18970245	0.974447	7	11.6601
PI_371056	SAMN09283190	Switzerland	46.283	7.417	995	S	NA	Landrace	BRIDG6	Illumina Hi-Seq 2500	101	12887888	66.6428	12887888	68.032	18745121	18338342	0.978299	7	11.8123
PI_371248	SAMN09283191	Switzerland	46.733	9.4	1335	S	2	Landrace	BRIDG6	Illumina Hi-Seq 2500	101	19048621	44.0845	19048621	45.9225	18118365	17607060	0.97178	7	10.7202
PI_371390	SAMN09283192	Switzerland	46.8	10.233	1897	S	2	Landrace	BRIDG6	Illumina Hi-Seq 2500	100	16472451	70.5712	16472451	71.3204	24823605	24272864	0.977814	9	15.7241
PI_371490	SAMN09283193	Switzerland	46.75	9.1	1277	S	2	Landrace	BRIDG6	Illumina Hi-Seq 2500	100	16445347	68.8079	16445347	69.7939	24256570	23698378	0.976988	9	15.2689
PI_374429	SAMN09283194	Serbia	43.287	20.615	413	S	2	Landrace	BRIDG6	Illumina Hi-Seq 2500	100	15398982	74.3242	15398982	74.9484	24674962	24171270	0.979587	9	15.8267
PI_382860	SAMN09924508	Ethiopia	12.783	37.65	2782	S	6	Landrace	BRIDG6	Illumina Hi-Seq 2500	101	10760333	65.1749	10760333	66.1375	15291991	14987229	0.98007	6	9.36898
PI_386650	SAMN09924510	Ethiopia	13.15	37.9	2842	S	6	Landrace	BRIDG6	Illumina Hi-Seq 2500	101	20043287	46.1701	20043287	48.147	20216244	19681274	0.973538	7	12.0619
PI_387098	SAMN09924512	Ethiopia	8.917	38.65	2241	S	6	Landrace	BRIDG6	Illumina Hi-Seq 2500	100	15554071	71.9827	15554071	72.4221	24016807	23624798	0.983678	9	15.2651
PI_410451	SAMN09924526	Pakistan	36.317	74.883	2290	S	6	Landrace	BRIDG6	Illumina Hi-Seq 2500	126	34326061	47.5698	34326061	49.7048	37243419	36250901	0.973351	17	29.4592
PI_410483	SAMN09924528	Pakistan	35.45	74.8	2130	S	6	Landrace	BRIDG6	Illumina Hi-Seq 2500	101	32210521	77.6616	32210521	78.022	56076469	54965744	0.980193	21	33.8963
PI_415348	SAMN09924531	Macedonia	41.972	22.139	NA	S	6	Landrace	BRIDG6	Illumina Hi-Seq 2500	101	20899437	65.4801	20899437	65.5544	29435986	28953337	0.983603	10	16.8928
PI_422233	SAMN09283195	NA	15.606	44.456	NA	NA	NA	Landrace	BRIDG6	Illumina Hi-Seq 2500	101	18745429	21.8697	18745429	24.0541	9206409	8718830	0.947039	3	5.13616
PI_436136	SAMN09283196	Chile	-38.667	-72.483	150	S	2	Landrace	BRIDG6	Illumina Hi-Seq 2500	100	16063708	72.5423	16063708	73.112	25270712	24869659	0.98413	9	16.0606
PI_436146	SAMN09283197	Chile	-38.733	-73	15	S	2	Landrace	BRIDG6	Illumina Hi-Seq 2500	101	25298585	80.9947	25298585	81.1795	44920154	44009804	0.979734	17	27.3985
PI_436149	SAMN09283198	Chile	-38.7	-73.283	20	S	2	Landrace	BRIDG6	Illumina Hi-Seq 2500	101	10830919	65.0918	10830919	64.9673	14788088	14456478	0.977576	5	9.08058
PI_436151	SAMN09283199	Chile	-40.267	-72.833	150	S	2	Landrace	BRIDG6	Illumina Hi-Seq 2500	101	10180593	73.7123	10180593	76.622	16067819	15216291	0.947004	5	8.54545
PI_54915	SAMN09924417	Norway	66.36	12.743	12	S	5	Landrace	BRIDG6	Illumina Hi-Seq 2500	126	34702415	80.0156	34702415	51.6496	39143943	38110937	0.97361	18	30.4239
PI_057015	SAMN09283200	Iraq	33.113	44.113	39	S	2	Landrace	BRIDG6	Illumina Hi-Seq 2500	126	35838190	79.3937	35838190	51.9014	40144127	38716689	0.964442	18	30.9808
PI_057089	SAMN09924419	China	30.625	114.359	27	S	6	Landrace	BRIDG6	Illumina Hi-Seq 2500	126	34174825	46.5989	34174825	48.6977	36259758	35355504	0.975062	17	28.7326
PI_057099	SAMN09283201	Georgia	42.089	43.589	929	S	2	Landrace	BRIDG6	Illumina Hi-Seq 2500	100	16730545	72.0307	16730545	72.5078	26167533	25686512	0.981618	9	16.2929
PI_584786	SAMN09924564	Iraq	33.115	44.115	38	S	6	Landrace	BRIDG6	Illumina Hi-Seq 2500	126	27821715	35.8969	27821715	38.7514	22089279	21502214	0.973423	10	15.0813
PI_584977	SAMN09924566	China	37.047	112.047	910	S	6	Landrace	BRIDG6	Illumina Hi-Seq 2500	100	15040777	74.2894	15040777	74.7999	24222436	23858771	0.984986	9	15.31
PI_064022	SAMN09924424	Uzbekistan	41.517	69.468	584	S	6	Landrace	BRIDG6	Illumina Hi-Seq 2500	100	16336910	70.2081	16336910	70.8625	24656774	24169917	0.980255	9	15.5088
PI_69421	SAMN09924427	China	36.759	114.559	57	S	6	Landrace	BRIDG6	Illumina Hi-Seq 2500	100	12218206	73.4296	12218206	74.1008	19043215	18761866	0.985226	7	12.2357
PI_87844	SAMN09924433	Korea North	40.476	127.497	1738	S	6	Landrace	BRIDG6	Illumina Hi-Seq 2500	101	13082563	61.5733	13082563	62.7018	17681477	17346670	0.981065	7	10.9084
PI_94790	SAMN09283202	Georgia	42.089	43.589	929	S	2	Landrace	BRIDG6	Illumina Hi-Seq 2500	101	14764355	63.9233	14764355	65.0803	20850685	20446807	0.98063	8	13.1347
PI_94875	SAMN09924435	Russian Federation	45.481	41.081	144	S	6	Landrace	BRIDG6	Illumina Hi-Seq 2500	101	15887379	48.0323	15887379	49.7348	16334490	15930942	0.975295	6	9.69481
PI_95167	SAMN09283203	Unknown	50	36.25	NA	S	2	Landrace	BRIDG6	Illumina Hi-Seq 2500	100	16302746	71.2839	16302746	71.8803	25063854	24650232	0.983497	9	16.0897
